# Supplementary material for: Investigating the Mechanism of Sodium Binding to SERT Using Direct Simulations
Source: PubMed Central journal article supplement (PMC8141550; doi:10.3389/fncel.2021.673782), 2021-05-10
Supplement: Data_Sheet_1.pdf [file Data_Sheet_1.pdf]

## *Supplementary Material*

### **1 Supplementary Data**

Compactness of the sodium binding site as measured in Fig 4 are shown on **Supplementary Fig1 and Fig2** for NA1 and NA2, respectively of all simulations, which show sodium binding. NA1 never assumes a small distance before sodium binding, while NA2 reaches in the absence of sodium infrequently a compactness that is comparable to the sodium bound state. The NA and the NA2 site show large size fluctuations in the absence of sodium.

The MDP file, the MD simulation Parameter file used to control Gromacs during the production run is proved in **Supplementary Text 1**.

Supplementary Material

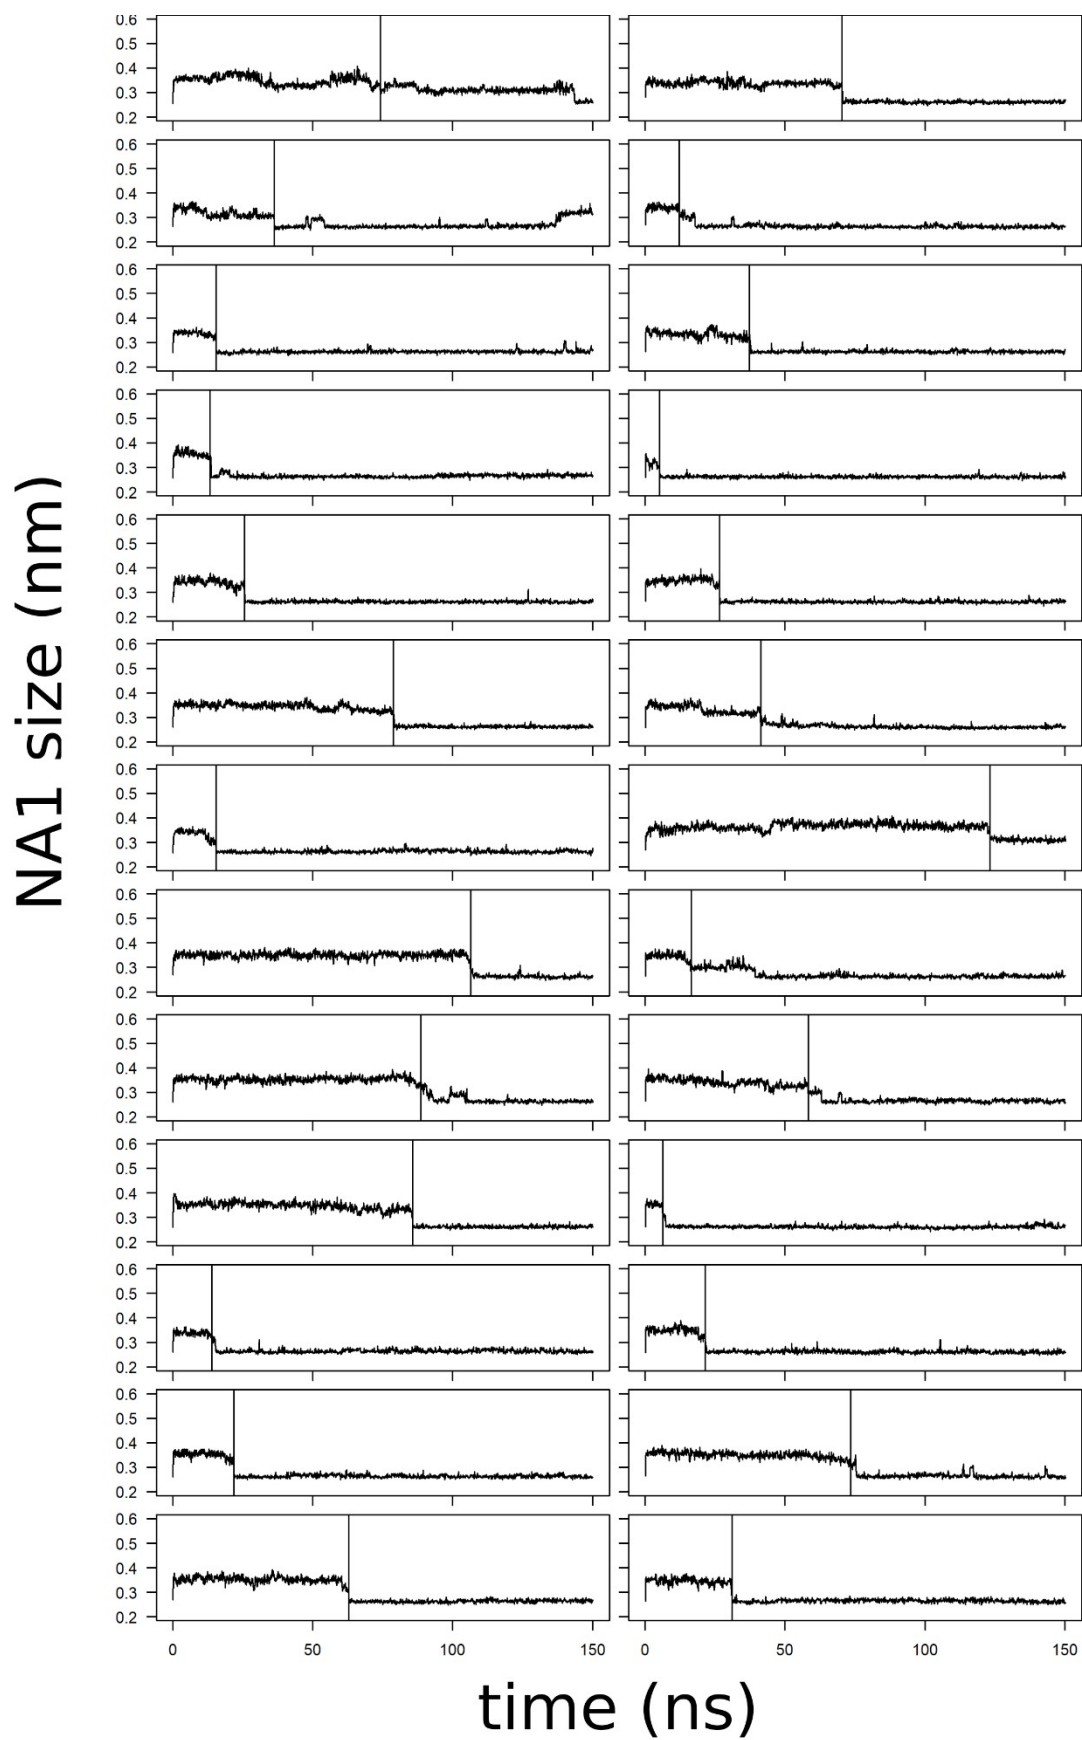

**Supplementary Fig1. Compactness of the NA1.** The compactness of the NA1 site was quantified by first determining the center of mass (COM) of the binding atoms (A96-O, D98-CG, N101-OD, S336-O, S336-OH, N368-OD) and then measuring the average distances between the COM and the coordinating atoms. The COM coincides with the position of the bound sodium ion. Points are measured every 100 ps and smoothed by a 1 ns running average. The time point of sodium entering to NA1 is indicated by a vertical line.

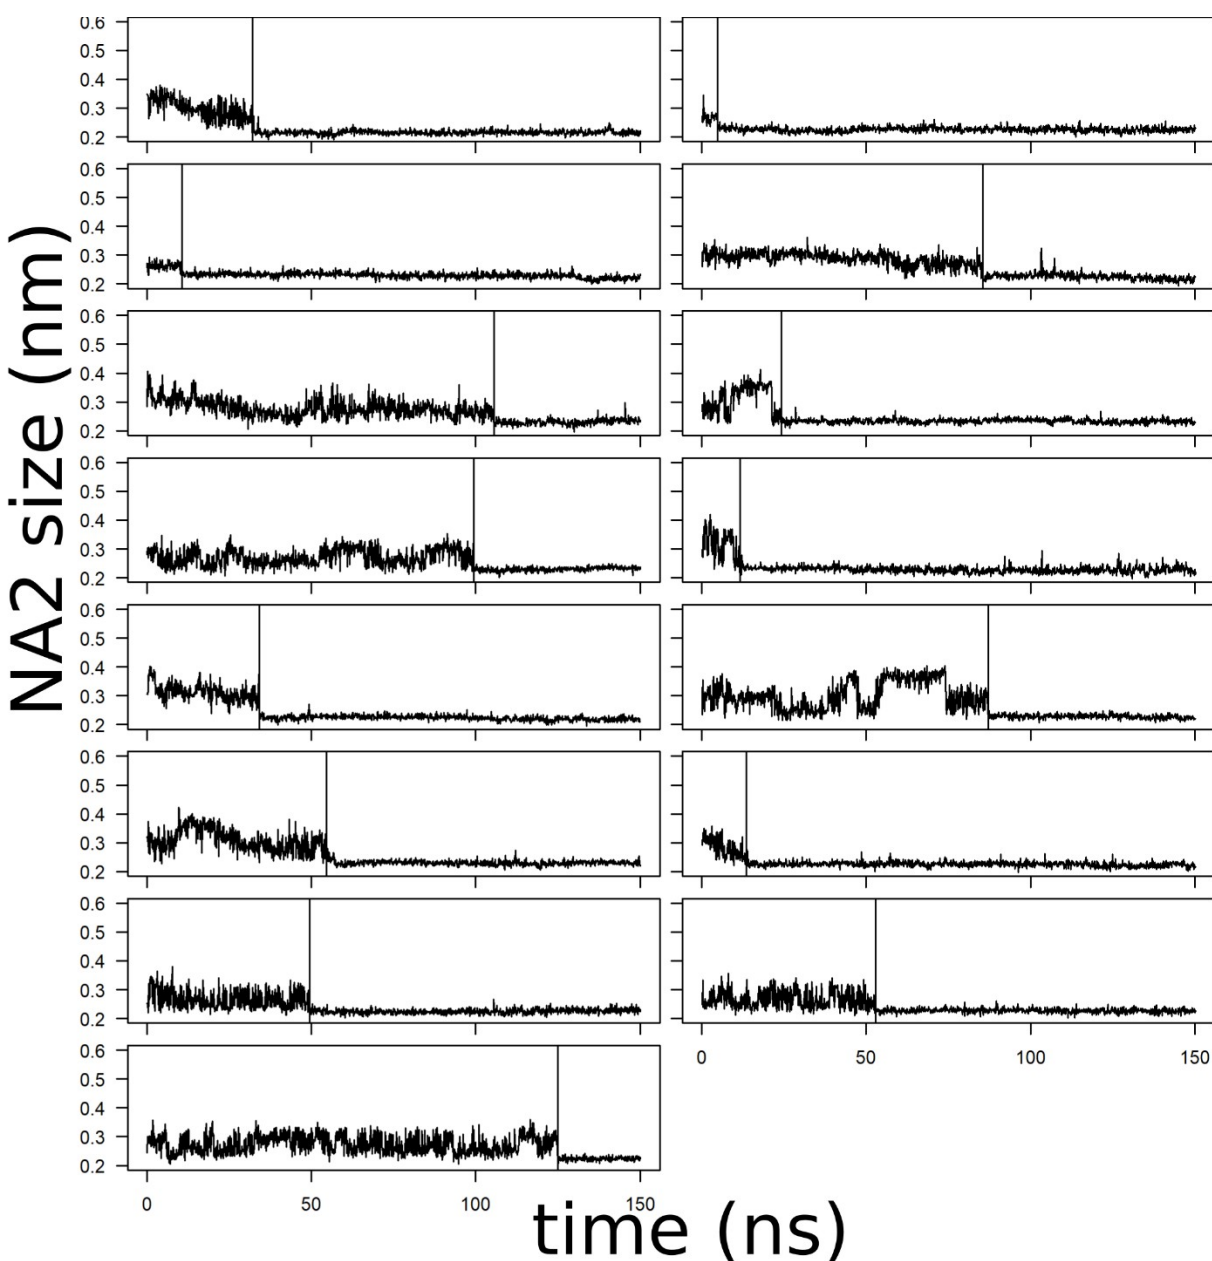

**Supplementary Fig2. Compactness of the NA2 site.** The compactness of the NA2 site was determined by first calculating the center of mass (COM) of the sodium coordinating atoms (G94-O,

## Supplementary Material

V97-O, L434-O). The COM coincides with the position of bound sodium. Time points are sampled every 100 ps, the curves are smoothed by a 1 ns running average. The time point of sodium entering the NA2 site is highlighted by a vertical line.

**Supplementary Text 1. Gromacs MDP file:** The Gromacs Molecular Dynamics Parameter (MDP) file that was used for carrying out the production simulations.

```
; VARIOUS PREPROCESSING OPTIONS
; Preprocessor information: use cpp syntax.
; e.g.: -I/home/joe/doe -I/home/mary/roe
#include                               =
; e.g.: -DPOSRES -DFLEXIBLE (note these variable names are case sensitive)
;define                                =

; RUN CONTROL PARAMETERS
integrator                             = md
; Start time and timestep in ps
tinit                                  = 0
dt                                     = 0.002
nsteps                                 = 750000000 ;150 ns
; For exact run continuation or redoing part of a run
init_step                              = 0
; Part index is updated automatically on checkpointing (keeps files separate)
simulation_part                        = 1
; mode for center of mass motion removal
comm-mode                              = linear
; number of steps for center of mass motion removal
nstcomm                                = 100
; group(s) for center of mass motion removal
comm-grps                              = system

; LANGEVIN DYNAMICS OPTIONS
; Friction coefficient (amu/ps) and random seed
bd-fric                                = 0
ld-seed                                 = 1993

; ENERGY MINIMIZATION OPTIONS
; Force tolerance and initial step-size
emtol                                  = 1000
emstep                                  = 0.0001
; Max number of iterations in relax-shells
```

```

niter                = 20
; Step size (ps^2) for minimization of flexible constraints
fcstep              = 0.001
; Frequency of steepest descents steps when doing CG
nstcgsteep         = 50
nbfscorr           = 100

; TEST PARTICLE INSERTION OPTIONS
rtpi               = 0.05

; OUTPUT CONTROL OPTIONS
; Output frequency for coords (x), velocities (v) and forces (f)
nstxout            = 50000 ; 100 ps
nstvout            = 0
nstfout            = 0
; Output frequency for energies to log file and energy file
nstlog             = 1000
nstcalcenergy      = 100
nstenergy          = 1000
; Output frequency and precision for .xtc file
nstxout-compressed = 250 ; 0.5 ps
compressed-x-precision = 1000
; This selects the subset of atoms for the compressed
; trajectory file. You can select multiple groups. By
; default, all atoms will be written.
compressed-x-grps  = Protein_and_ions
; Selection of energy groups
energygrps         =

; NEIGHBORSEARCHING PARAMETERS
; cut-off scheme (Verlet: particle based cut-offs, group: using charge
groups)
cutoff-scheme      = Verlet
; nblast update frequency
nstlist            = 50
; ns algorithm (simple or grid)
ns-type            = Grid
; Periodic boundary conditions: xyz, no, xy
pbc                = xyz
periodic_molecules = no
; Allowed energy error due to the Verlet buffer in kJ/mol/ps per atom,
; a value of -1 means: use rlist
verlet-buffer-tolerance = 0.005

```

## Supplementary Material

```
; nblast cut-off
rlist                = 0.9
; long-range cut-off for switched potentials
rlistlong            = -1
nstcalclr            = -1

; OPTIONS FOR ELECTROSTATICS AND VDW
; Method for doing electrostatics
coulombtype          = PME
coulomb-modifier     = Potential-shift-Verlet
rcoulomb-switch      =
rcoulomb             = 0.9
; Relative dielectric constant for the medium and the reaction field
epsilon_r            = 1.0
epsilon_rf           = 1
; Method for doing Van der Waals
vdw-type             = Cut-off
vdw-modifier         = Potential-shift-Verlet
; cut-off lengths
rvdw-switch          =
rvdw                 = 0.9
; Apply long range dispersion corrections for Energy and Pressure
DispCorr             = EnerPres
; Extension of the potential lookup tables beyond the cut-off
table-extension      = 1
; Separate tables between energy group pairs
energygrp-table      =
; Spacing for the PME/PPPM FFT grid
fourierspacing       = 0.12
; FFT grid size, when a value is 0 fourierspacing will be used
fourier_nx           = 0
fourier_ny           = 0
fourier_nz           = 0
; EWALD/PME/PPPM parameters
pme_order            = 4
ewald_rtol           = 1e-05
ewald-rtol-lj        = 0.001
lj-pme-comb-rule     = Geometric
ewald_geometry       = 3d
epsilon_surface      = 0

; IMPLICIT SOLVENT ALGORITHM
implicit_solvent     = No
```

```

; GENERALIZED BORN ELECTROSTATICS
; Algorithm for calculating Born radii
gb-algorithm          = Still
; Frequency of calculating the Born radii inside rlist
nstgbradii           = 1
; Cutoff for Born radii calculation; the contribution from atoms
; between rlist and rgradii is updated every nstlist steps
rgradii              = 1
; Dielectric coefficient of the implicit solvent
gb-epsilon-solvent   = 80
; Salt concentration in M for Generalized Born models
gb-saltconc          = 0
; Scaling factors used in the OBC GB model. Default values are OBC(II)
gb-obc-alpha         = 1
gb-obc-beta          = 0.8
gb-obc-gamma         = 4.85
gb-dielectric-offset = 0.009
sa-algorithm         = Ace-approximation
; Surface tension (kJ/mol/nm^2) for the SA (nonpolar surface) part of GBSA
; The value -1 will set default value for Still/HCT/OBC GB-models.
sa-surface-tension   = -1

; OPTIONS FOR WEAK COUPLING ALGORITHMS
; Temperature coupling
tcoupl               = v-rescale
nsttcouple           = -1
nh-chain-length      = 10
print-nose-hoover-chain-variables = no
; Groups to couple separately
tc-grps              = ProtLigIon membrane Water_and_ions
; Time constant (ps) and reference temperature (K)
tau-t                = 0.5  0.5  0.5
ref-t                = 310  310  310
; pressure coupling
Pcoupl               = Parrinello-Rahman ; Berendsen for EM and equi-
libration;Parrinello-Rahman for production
Pcoupltype           = Semiisotropic
nstpcouple           = -1
; Time constant (ps), compressibility (1/bar) and reference P (bar)
tau-p                = 20.1
compressibility       = 4.5e-05  4.5e-05
ref-p                 = 1.0      1.0

```

## Supplementary Material

```
; Scaling of reference coordinates, No, All or COM
refcoord_scaling      = All

; OPTIONS FOR QMMM calculations
QMMM                  = no
; Groups treated Quantum Mechanically
QMMM-grps             =
; QM method
QMmethod              =
; QMMM scheme
QMMMScheme            = normal
; QM basisset
QMbasis               =
; QM charge
QMcharge              =
; QM multiplicity
QMmult                =
; Surface Hopping
SH                    =
; CAS space options
CASorbitals           =
CASelectrons          =
SAon                  =
SAoff                 =
SAsteps               =
; Scale factor for MM charges
MMChargeScaleFactor   = 1
; Optimization of QM subsystem
bOPT                  =
bTS                   =

; SIMULATED ANNEALING
; Type of annealing for each temperature group (no/single/periodic)
annealing              = no
; Number of time points to use for specifying annealing in each group
annealing-npoints     =
; List of times at the annealing points for each group
annealing-time        =
; Temp. at each annealing point, for each group.
annealing-temp        =

; GENERATE VELOCITIES FOR STARTUP RUN
gen-vel                = no
```



```

gen-temp          = 310.0
gen-seed         = -1

; OPTIONS FOR BONDS
constraints       = h-bonds
; Type of constraint algorithm
constraint-algorithm = lincs
; Do not constrain the start configuration
continuation      = no
; Use successive overrelaxation to reduce the number of shake iterations
Shake-SOR        = yes
; Relative tolerance of shake
shake-tol        = 0.0001
; Highest order in the expansion of the constraint coupling matrix
lincs-order      = 4
; Number of iterations in the final step of LINCS. 1 is fine for
; normal simulations, but use 2 to conserve energy in NVE runs.
; For energy minimization with constraints it should be 4 to 8.
lincs-iter       = 2
; Lincs will write a warning to the stderr if in one step a bond
; rotates over more degrees than
lincs-warnangle  = 30
; Convert harmonic bonds to morse potentials
morse            = no

; ENERGY GROUP EXCLUSIONS
; Pairs of energy groups for which all non-bonded interactions are ex-
cluded
energygrp-excl   =

; WALLS
; Number of walls, type, atom types, densities and box-z scale factor for
Ewald
nwall            = 0
wall_type        = 9-3
wall_r_linpot    = -1
wall-atomtype    =
wall-density     =
wall_ewald_zfac  = 3

; COM PULLING
; Pull type: no, umbrella, constraint or constant-force
pull             = no

```

## Supplementary Material

```
; ENFORCED ROTATION
; Enforced rotation: No or Yes
rotation                = no

; Group to display and/or manipulate in interactive MD session
IMD-group                =

; NMR refinement stuff
; Distance restraints type: No, Simple or Ensemble
disre                    = No
; Force weighting of pairs in one distance restraint: Conservative or
Equal
disre-weighting          = Conservative
; Use sqrt of the time averaged times the instantaneous violation
disre-mixed              = no
disre-fc                  = 100
disre-tau                 = 0
; Output frequency for pair distances to energy file
nstdisreout              = 5000
; Orientation restraints: No or Yes
orire                    = no
; Orientation restraints force constant and tau for time averaging
orire-fc                  = 0
orire-tau                 = 0
orire-fitgrp              =
; Output frequency for trace(SD) and S to energy file
nstorireout               = 100

; Free energy variables
free-energy                = no
couple-moltype            =
couple-lambda0            = vdw-q
couple-lambda1            = vdw-q
couple-intramol           = no
init-lambda               = 0
init-lambda-state         = -1
delta-lambda              = 0
nstdhdl                   = 50
fep-lambdas               =
mass-lambdas              =
coul-lambdas              =
vdw-lambdas               =
```

```
bonded-lambdas          =
restraint-lambdas       =
temperature-lambdas     =
calc-lambda-neighbors  = 1
init-lambda-weights     =
dhdl-print-energy        = no
sc-alpha                = 0
sc-power                = 1
sc-r-power              = 6
sc-sigma                = 0.3
sc-coul                 = no
separate-dhdl-file      = yes
dhdl-derivatives        = yes
dh_hist_size            = 0
dh_hist_spacing         = 0.1
```

```
; Non-equilibrium MD stuff
```

```
acc-grps                =
accelerate               =
freezegrps              =
freezedim               =
cos-acceleration         = 0
deform                  =
```

```
; simulated tempering variables
```

```
simulated-tempering     = no
simulated-tempering-scaling = geometric
sim-temp-low            = 300
sim-temp-high           = 300
```

```
; Electric fields
```

```
; Format is number of terms (int) and for all terms an amplitude (real)
; and a phase angle (real)
```

```
E-x                      =
```

```
; Time dependent (pulsed) electric field. Format is omega, time for pulse
; peak, and sigma (width) for pulse. Sigma = 0 removes pulse, leaving
; the field to be a cosine function.
```

```
E-xt                     =
```

```
E-y                       =
```

```
E-yt                     =
```

```
E-z                       =
```

```
E-zt                     =
```

## Supplementary Material

```
; Ion/water position swapping for computational electrophysiology setups  
; Swap positions along direction: no, X, Y, Z  
swapcoords          = no
```

```
; AdResS parameters  
adress              = no
```

```
; User defined thingies  
user1-grps         =  
user2-grps         =  
userint1           = 0  
userint2           = 0  
userint3           = 0  
userint4           = 0  
userreal1          = 0  
userreal2          = 0  
userreal3          = 0  
userreal4          = 0
```
